# Supplementary material for: Neuroprotective Effects of Pomegranate Juice against Parkinson’s Disease and Presence of Ellagitannins-Derived Metabolite—Urolithin A—In the Brain
Source: MDPI journal article supplement (doi:10.3390/ijms21010202), 2019-12-27
Supplement: s1 [file s1]

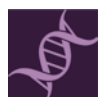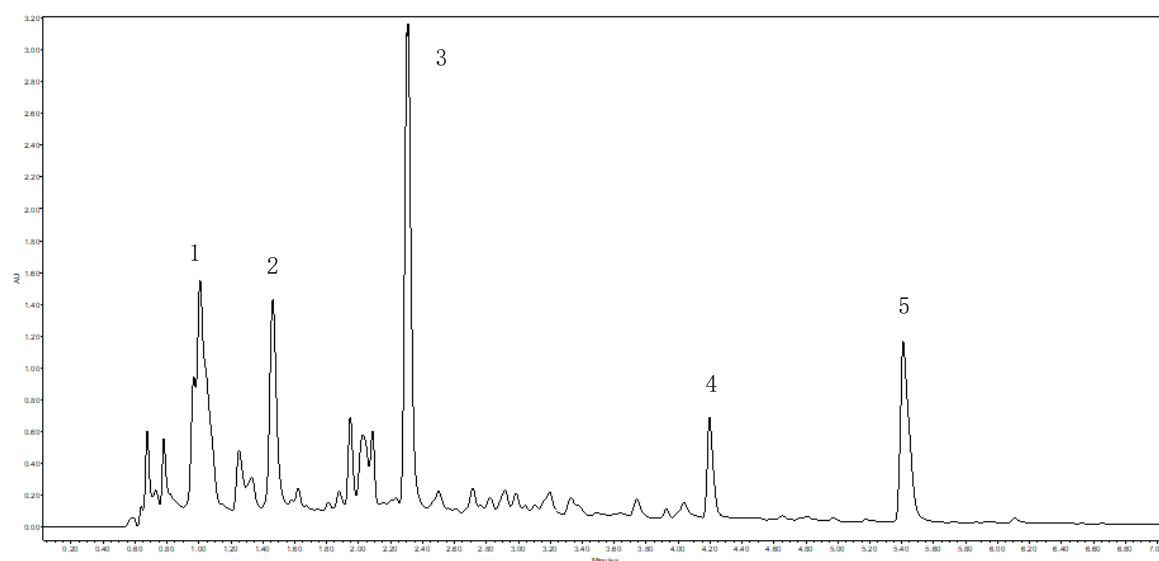

**Figure S1.** UPLC-PDA chromatogram at 250 nm of pomegranate juice (PJ). Proposed phenolic compounds were numbered by elution order 1-galloyl-hexoside, 2-ellagic acid-hexoside, 3-bis-HHDP-hexoside (pedunculagin), 4-galloyl-bis-HHDP-hexoside (casuarinin), 5- elagic acid.

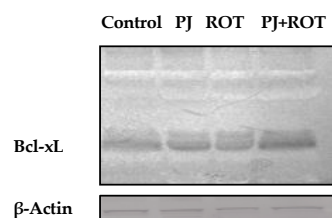

**Figure S2.** Uncropped full-length picture of Western blotting membrane presented in Figure 7 a.
